# Supplementary material for: Cross-evaluating WRF-Chem v4.1.2, TROPOMI, APEX and in situ NO 2 measurements over Antwerp, Belgium
Source: Copernicus journal article supplement (doi:10.5194/egusphere-2022-882), 2022-09-09
Supplement: Supplementary file 1 [file egusphere-2022-882-supplement.pdf]

## Supplement

**Table S1: List of meteorological and air quality measuring stations utilized for comparison.**

| Site name            | Latitude, °N | Longitude, °E | Measured quantity (units)                                                                                                                                    |
|----------------------|--------------|---------------|--------------------------------------------------------------------------------------------------------------------------------------------------------------|
| <i>METEOROLOGY</i>   |              |               |                                                                                                                                                              |
| STABROEK             | 51.3493      | 4.3789        | Temperature (°C),<br>Total precipitation (mm),<br>Wind speed (m/s)<br>Wind direction (°)<br>Min and max humidity (%)                                         |
| SINT-KATELIJNE-WAVER | 51.0696      | 4.5346        | Pressure (hPa)<br>Solar irradiance (Wh/m <sup>2</sup> )                                                                                                      |
| DIEPENBEEK           | 50.9155      | 5.4503        | Mixing layer height (m)                                                                                                                                      |
| UCCLE                | 50.7975      | 4.3594        | Mixing layer height (m),<br>Ozone mixing ratio (ppm)<br>Pressure (hPa)<br>Temperature (K)<br>Relative humidity (%)<br>Wind speed (m/s)<br>Wind direction (°) |
| <i>AIR QUALITY</i>   |              |               |                                                                                                                                                              |
| MARIAKERKE           | 51.0670      | 3.6828        | NO, NO <sub>2</sub>                                                                                                                                          |
| OOSTEEKLO            | 51.190       | 3.6873        | NO, NO <sub>2</sub>                                                                                                                                          |
| WONDELGEM            | 51.0890      | 3.7161        | NO, NO <sub>2</sub>                                                                                                                                          |
| GENT                 | 51.0583      | 3.7293        | NO, NO <sub>2</sub> , O <sub>3</sub> , CO                                                                                                                    |
| EVERGEM              | 51.1247      | 3.7395        | NO, NO <sub>2</sub>                                                                                                                                          |
| GENT (G.Carlierlaan) | 51.0407      | 3.7350        | NO, NO <sub>2</sub>                                                                                                                                          |

|                                  |          |         |                                           |
|----------------------------------|----------|---------|-------------------------------------------|
| DESTELBERGEN                     | 51.0613  | 3.7753  | NO, NO <sub>2</sub> , O <sub>3</sub>      |
| SINT-KRUIS-WI                    | 51.1501  | 3.8087  | NO, NO <sub>2</sub> , O <sub>3</sub>      |
| ZELZATE                          | 51.1961  | 3.8229  | NO, NO <sub>2</sub>                       |
| WACHTEBEKE                       | 51.1761  | 3.8699  | NO, NO <sub>2</sub>                       |
| DOEL                             | 51.3182  | 4.2626  | NO, NO <sub>2</sub>                       |
| KALLO                            | 51.2630  | 4.2789  | NO, NO <sub>2</sub>                       |
| ANTWERPEN                        | 51.25010 | 4.3421  | NO, NO <sub>2</sub>                       |
| ANTWERPEN                        | 51.2643  | 4.3413  | NO, NO <sub>2</sub>                       |
| BERENDRECHT                      | 51.3488  | 4.3397  | NO, NO <sub>2</sub> , O <sub>3</sub>      |
| STABROEK                         | 51.3277  | 4.3623  | NO <sub>2</sub>                           |
| ANTWERPEN                        | 51.2814  | 4.3858  | NO, NO <sub>2</sub>                       |
| ANTWERPEN                        | 51.2558  | 4.3854  | NO, NO <sub>2</sub>                       |
| ANTWERPEN<br>(Groenenborgerlaan) | 51.1771  | 4.4179  | NO, NO <sub>2</sub>                       |
| ANTWERPEN (Belg)                 | 51.2082  | 4.4216  | NO, NO <sub>2</sub>                       |
| ANTWERPEN                        | 51.2610  | 4.4244  | NO, NO <sub>2</sub>                       |
| ANTWERPEN (Park Spoor<br>Noord)  | 51.2286  | 4.4285  | NO, NO <sub>2</sub>                       |
| BORGERHOUT                       | 51.2097  | 4.4318  | NO, NO <sub>2</sub> , O <sub>3</sub> , CO |
| KAPELLEN                         | 51.3204  | 4.4448  | NO, NO <sub>2</sub>                       |
| SCHOTEN                          | 51.2521  | 4.4914  | NO, NO <sub>2</sub> , O <sub>3</sub>      |
| AARSCHOT                         | 50.9775  | 4.8376  | NO, NO <sub>2</sub> , O <sub>3</sub>      |
| LAAKDAL                          | 51.1204  | 5.02155 | NO, NO <sub>2</sub>                       |

5 **Table S2: Statistics of model comparisons (correlation coefficient, root mean square error and mean bias) against meteorological data for the PBL sensitivity simulations described in Section 4.1 (Table 3). Statistics are obtained for the ensemble of measurement sites detailed in Table S1. The values shown in red highlight the three worst performing parameterization schemes for each statistic and variable.**

| CEILOMETER          |                |                         |           |
|---------------------|----------------|-------------------------|-----------|
| Mixing Layer Height |                |                         |           |
|                     | R <sup>2</sup> | Root mean squared error | Mean bias |
| P1                  | 0.687          | 309                     | -208.1    |
| P2                  | 0.688          | 264                     | -102.1    |
| P4                  | 0.504          | 413                     | 225.8     |
| P5                  | 0.767          | 245                     | -166.6    |
| P6                  | 0.789          | 262                     | -202.0    |
| P8                  | 0.657          | 325                     | -205.2    |
| P9                  | 0.586          | 385                     | -295.0    |
| P10                 | 0.416          | 339                     | 148.3     |
| P11                 | 0.682          | 313                     | -220.9    |
| P12                 | 0.606          | 403                     | -322.2    |
| SURFACE             |                |                         |           |
| Temperature         |                |                         |           |
| P1                  | 0.984          | 1.142                   | -0.144    |
| P2                  | 0.982          | 1.275                   | -0.371    |
| P4                  | 0.986          | 1.391                   | -0.867    |
| P5                  | 0.98           | 1.281                   | -0.45     |
| P6                  | 0.968          | 1.937                   | -1.318    |
| P8                  | 0.981          | 1.25                    | 0.285     |
| P9                  | 0.981          | 1.191                   | 0.005     |
| P10                 | 0.95           | 2.36                    | 0.276     |
| P11                 | 0.984          | 1.157                   | -0.279    |
| P12                 | 0.982          | 1.147                   | -0.131    |
| Relative Humidity   |                |                         |           |
|                     | R <sup>2</sup> | Root mean squared error | Mean bias |
| P1                  | 0.976          | 5.679                   | -3.248    |
| P2                  | 0.964          | 5.793                   | 2.316     |
| P4                  | 0.937          | 6.548                   | 2.47      |
| P5                  | 0.972          | 5.026                   | -2.023    |
| P6                  | 0.966          | 7.791                   | 5.903     |

|     |       |       |        |
|-----|-------|-------|--------|
| P8  | 0.969 | 5.7   | -3.259 |
| P9  | 0.97  | 6.908 | -4.422 |
| P10 | 0.949 | 7.796 | 2.693  |
| P11 | 0.976 | 4.986 | -2.174 |
| P12 | 0.976 | 5.735 | -3.679 |

Solar Irradiance

|     | R <sup>2</sup> | Root mean squared error | Mean bias |
|-----|----------------|-------------------------|-----------|
| P1  | 0.999          | 27.208                  | 19.026    |
| P2  | 0.999          | 27.245                  | 19.036    |
| P4  | 0.999          | 26.829                  | 17.032    |
| P5  | 0.998          | 25.071                  | 9.888     |
| P6  | 0.996          | 29.843                  | 4.48      |
| P8  | 0.999          | 27.275                  | 19.1      |
| P9  | 0.999          | 27.022                  | 18.85     |
| P10 | 0.999          | 26.745                  | 17.906    |
| P11 | 0.999          | 27.291                  | 19.09     |
| P12 | 0.999          | 27.188                  | 19.001    |

Wind Speed

|     | R <sup>2</sup> | Root mean squared error | Mean bias |
|-----|----------------|-------------------------|-----------|
| P1  | 0.699          | 1.342                   | 1.14      |
| P2  | 0.812          | 1.79                    | 1.642     |
| P4  | 0.773          | 1.722                   | 1.479     |
| P5  | 0.744          | 1.305                   | 1.142     |
| P6  | 0.785          | 1.198                   | 1.023     |
| P8  | 0.679          | 1.436                   | 1.182     |
| P9  | 0.719          | 1.313                   | 1.112     |
| P10 | 0.656          | 1.16                    | 0.92      |
| P11 | 0.691          | 1.332                   | 1.128     |
| P12 | 0.705          | 1.365                   | 1.164     |

Wind Direction

|    | R <sup>2</sup> | Root mean squared error | Mean bias |
|----|----------------|-------------------------|-----------|
| P1 | 0.852          | 22.501                  | 13.944    |
| P2 | 0.884          | 20.313                  | 13.11     |
| P4 | 0.601          | 19.419                  | 11.853    |
| P5 | 0.876          | 23.504                  | 17.013    |
| P6 | 0.89           | 23.025                  | 17.244    |

|                   |                |                         |           |
|-------------------|----------------|-------------------------|-----------|
| P8                | 0.859          | 22.281                  | 15.139    |
| P9                | 0.865          | 21.957                  | 14.162    |
| P10               | 0.785          | 23.196                  | 8.583     |
| P11               | 0.85           | 22.797                  | 14.301    |
| P12               | 0.859          | 22.036                  | 13.991    |
| SONDE             |                |                         |           |
| Temperature       |                |                         |           |
|                   | R <sup>2</sup> | Root mean squared error | Mean bias |
| P1                | 0.893          | 1.028                   | 0.137     |
| P2                | 0.923          | 0.749                   | 0.127     |
| P4                | 0.936          | 0.726                   | 0.036     |
| P5                | 0.927          | 0.791                   | -0.004    |
| P6                | 0.925          | 0.858                   | -0.576    |
| P8                | 0.887          | 1.163                   | 0.548     |
| P9                | 0.898          | 1.011                   | 0.094     |
| P10               | 0.881          | 1.244                   | 0.407     |
| P11               | 0.928          | 0.821                   | 0.143     |
| P12               | 0.917          | 0.887                   | 0.143     |
| Relative Humidity |                |                         |           |
|                   | R <sup>2</sup> | Root mean squared error | Mean bias |
| P1                | 0.827          | 7.415                   | -0.230    |
| P2                | 0.906          | 5.856                   | -0.330    |
| P4                | 0.833          | 7.218                   | 0.644     |
| P5                | 0.839          | 7.138                   | -0.023    |
| P6                | 0.894          | 7.008                   | 2.53      |
| P8                | 0.826          | 7.298                   | -0.245    |
| P9                | 0.765          | 8.387                   | 0.310     |
| P10               | 0.799          | 8.329                   | 0.994     |
| P11               | 0.841          | 7.035                   | -0.094    |
| P12               | 0.8            | 7.775                   | -0.094    |
| Wind Speed        |                |                         |           |
|                   | R <sup>2</sup> | Root mean squared error | Mean bias |
| P1                | 0.491          | 0.974                   | 0.23      |
| P2                | 0.34           | 1.105                   | 0.175     |
| P4                | 0.354          | 1.146                   | 0.275     |

|                |                |                         |           |
|----------------|----------------|-------------------------|-----------|
| P5             | 0.569          | 0.923                   | 0.215     |
| P6             | 0.477          | 0.998                   | 0.345     |
| P8             | 0.645          | 0.848                   | 0.265     |
| P9             | 0.596          | 0.87                    | 0.142     |
| P10            | 0.524          | 1.023                   | 0.385     |
| P11            | 0.44           | 1.004                   | 0.215     |
| P12            | 0.565          | 0.888                   | 0.215     |
| Wind Direction |                |                         |           |
|                | R <sup>2</sup> | Root mean squared error | Mean bias |
| P1             | 0.614          | 9.838                   | 3.61      |
| P2             | 0.498          | 12.925                  | 4.78      |
| P4             | 0.605          | 13.162                  | 5.67      |
| P5             | 0.667          | 8.945                   | 1.58      |
| P6             | 0.676          | 9.06                    | 3.28      |
| P8             | 0.603          | 9.33                    | 1.74      |
| P9             | 0.571          | 9.462                   | 1.57      |
| P10            | 0.658          | 8.975                   | 2.9       |
| P11            | 0.66           | 9.053                   | 3.21      |
| P12            | 0.588          | 9.453                   | 3.21      |
| Ozone VMR      |                |                         |           |
|                | R <sup>2</sup> | Root mean squared error | Mean bias |
| P1             | 0.951          | 0.003                   | 3.04e-4   |
| P2             | 0.855          | 0.005                   | -2.16e-3  |
| P4             | 0.967          | 0.004                   | -1.32e-3  |
| P5             | 0.958          | 0.002                   | 2.09e-4   |
| P6             | 0.973          | 0.002                   | -1.38e-4  |
| P8             | 0.951          | 0.003                   | 9.00e-4   |
| P9             | 0.944          | 0.003                   | 8.71e-4   |
| P10            | 0.354          | 0.007                   | -3.76e-3  |
| P11            | 0.951          | 0.003                   | 3.8e-4    |
| P12            | 0.957          | 0.004                   | 3.8e-4    |

10 Table S3: Same as Table S2, but for comparisons against NO<sub>2</sub> surface data, as described in Section 4.2.1.

|    |                |                         |           |
|----|----------------|-------------------------|-----------|
|    | R <sup>2</sup> | Root mean squared error | Mean bias |
| P1 | 0.729          | 6.011                   | 0.853     |

|     |       |        |        |
|-----|-------|--------|--------|
| P2  | 0.732 | 9.353  | 4.432  |
| P4  | 0.527 | 22.578 | 18.9   |
| P5  | 0.755 | 5.635  | 0.073  |
| P6  | 0.723 | 6.338  | 1.703  |
| P8  | 0.871 | 3.71   | -0.423 |
| P9  | 0.737 | 6.436  | 0.244  |
| P10 | 0.455 | 23.574 | 20.024 |
| P11 | 0.716 | 6.172  | 0.951  |
| P12 | 0.798 | 6.577  | 1.196  |

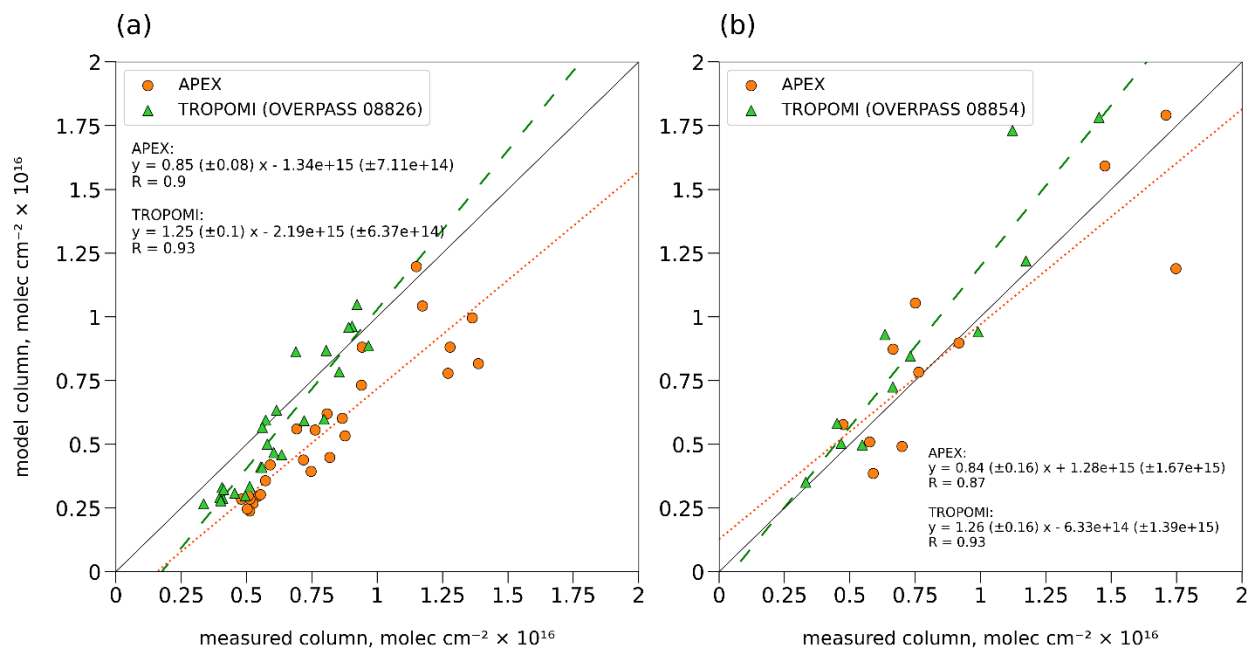

**Figure S1. Scatter plots and linear regressions of modelled vs measured columns (APEX and TROPOMI\_v1.3) without application of TROPOMI and APEX averaging kernels on model output, on (a) 27th of June and (b) 29th of June. Orange dots and dotted regression lines are for APEX, green triangles and lines for TROPOMI.**

15

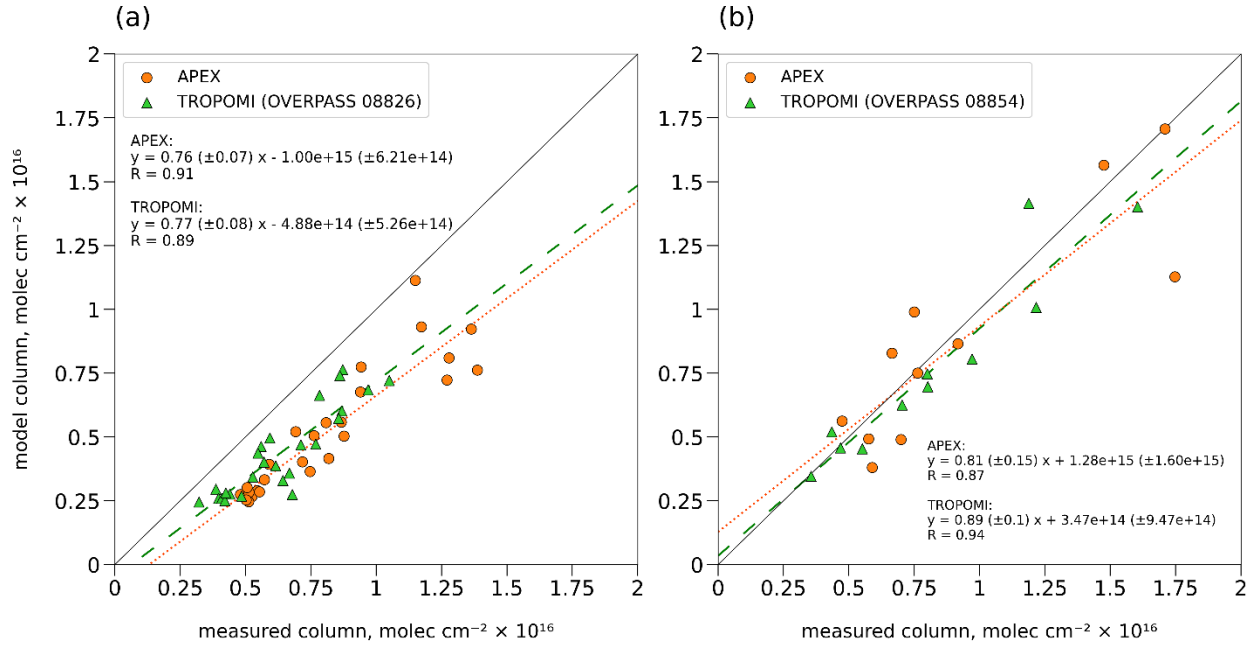

Figure S2. Same as Fig.19, using TROPOMI\_PAL.

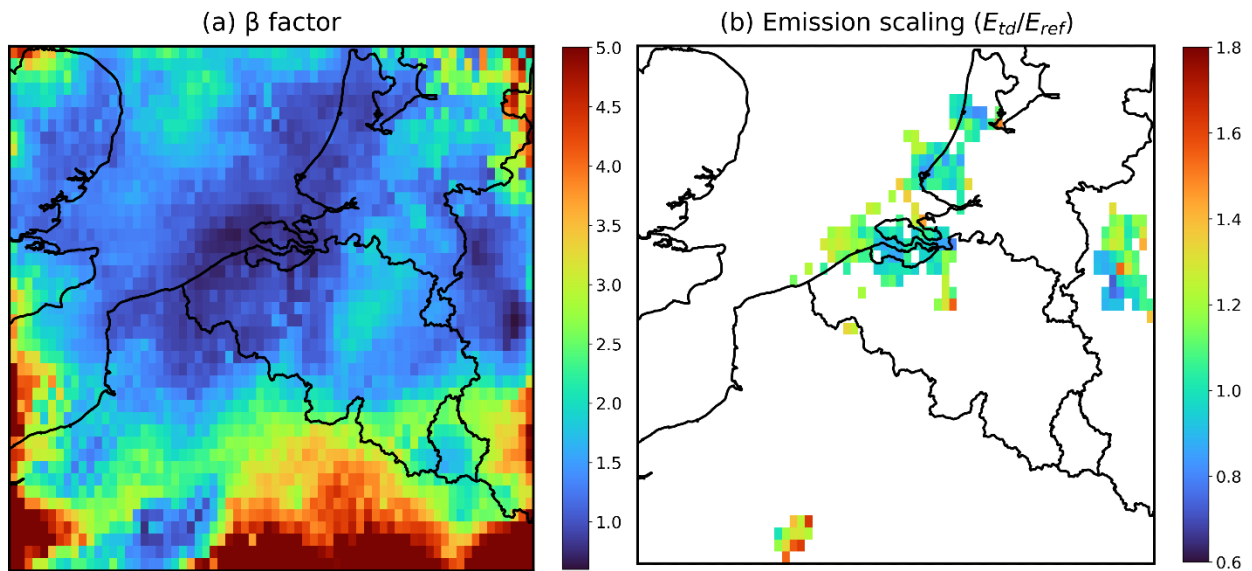

Figure S3. Calculated (a)  $\beta$  factor and (b) emission scaling factor derived from Eq. 4 in order to improve model agreement with bias-corrected TROPOMI data. White pixels indicate pixels removed due to TROPOMI values being too low ( $<4 \times 10^{15}$  cm<sup>-2</sup>), or  $\beta$  being too high ( $>1.45$ ). See Section 4.3.3 for details.

20



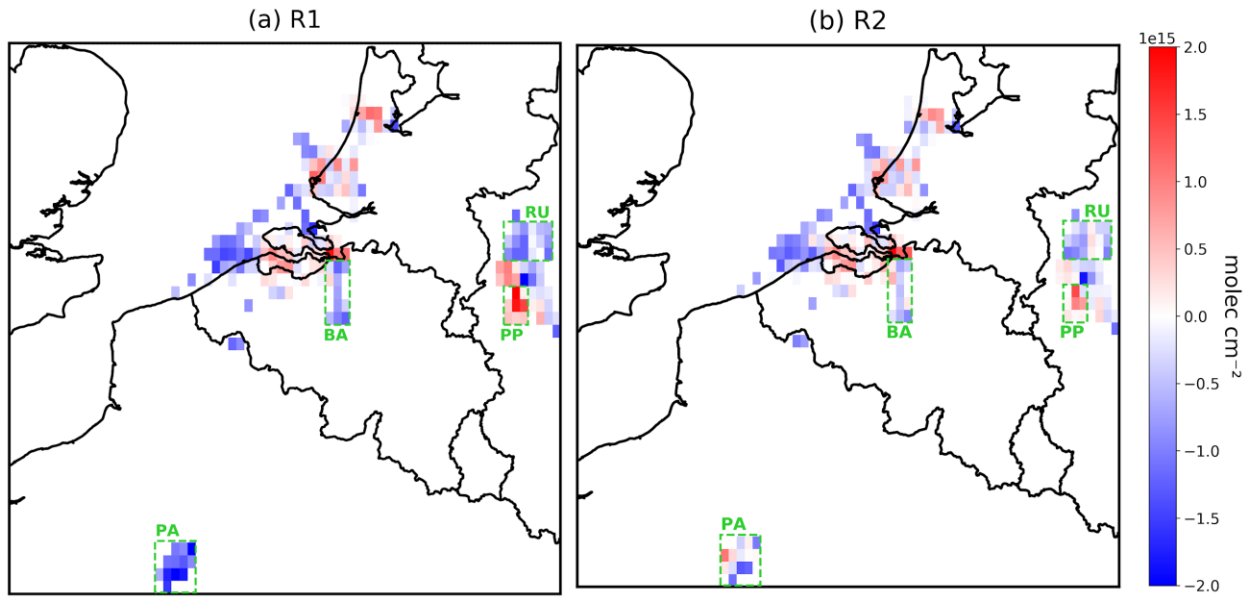

25 **Figure S4.** Difference between 15-day averaged WRF-Chem and bias-corrected TROPOMI NO<sub>2</sub>, shown for (a) simulation R1, and (b) simulation R2 using top-down emissions. The dashed green boxes represent four regions of interest: Paris (PA), Brussels-Antwerp (BA), the Ruhr area (RU) and a cluster of power plants in Western Germany (PP). Blank areas are pixels for which the emission adjustment is not considered reliable (see text).
